# Supplementary material for: Thermodynamics Analysis of a Membrane Distillation Crystallization Ion Recovery System for Hydroponic Greenhouses Assisted with Renewable Energy
Source: MDPI journal article supplement (doi:10.3390/su15031876), 2023-01-18
Supplement: s1 [file s1]

## **Supplementary Materials**

# **Thermodynamics Analysis of a Membrane Distillation Crystallization Ion Recovery System for Hydroponic Greenhouses Assisted with Renewable Energy**

**Ragad F. Alshebli \* and Yusuf Bicer**

Division of Sustainable Development, College of Science and Engineering, Hamad Bin Khalifa University, Qatar Foundation, Doha P.O. Box 34110, Qatar; ybicer@hbku.edu.qa

\* Correspondence: raal43645@hbku.edu.qa

Table S1. Balance mass and energy equations of each system.

| Steam Rankine Cycle (SRC)                                           |                                                             |                                                                                                            |
|---------------------------------------------------------------------|-------------------------------------------------------------|------------------------------------------------------------------------------------------------------------|
| Unit Name                                                           | Mass Balance Equation (MBE)                                 | Energy Balance Equation (EBE)                                                                              |
| Pump 1 (P1)                                                         | $\dot{m}_1 = \dot{m}_2$                                     | $\dot{m}_1 h_1 + \dot{W}_{P1} = \dot{m}_2 h_2$                                                             |
| O-Feed Water Heater (OFWH)                                          | $\dot{m}_{12} + \dot{m}_2 = \dot{m}_3$                      | $\dot{m}_{12} h_{12} + \dot{m}_2 h_2 = \dot{m}_3 h_3$                                                      |
| Pump 2 (P2)                                                         | $\dot{m}_3 = \dot{m}_4$                                     | $\dot{m}_3 h_3 + \dot{W}_{P2} = \dot{m}_4 h_4$                                                             |
| C-Feed Water Heater (CFWH)                                          | $\dot{m}_{14} + \dot{m}_4 = \dot{m}_6 + \dot{m}_5$          | $\dot{m}_{14} h_{14} + \dot{m}_4 h_4 = \dot{m}_6 h_6 + \dot{m}_5 h_5$                                      |
| Pump 3 (P3)                                                         | $\dot{m}_6 = \dot{m}_7$                                     | $\dot{m}_6 h_6 + \dot{W}_{P3} = \dot{m}_7 h_7$                                                             |
| Mixing Chamber 1 (MC1)                                              | $\dot{m}_7 + \dot{m}_5 = \dot{m}_8$                         | $\dot{m}_7 h_7 + \dot{m}_5 h_5 = \dot{m}_8 h_8$                                                            |
| Boiler (Br)                                                         | $\dot{m}_8 = \dot{m}_9$                                     | $\dot{m}_8 h_8 + \dot{Q}_{PTC} = \dot{m}_9 h_9$                                                            |
| High-P Turbine (HPT)                                                | $\dot{m}_9 = \dot{m}_{10}$                                  | $\dot{m}_9 h_9 = \dot{W}_{HPT} + \dot{m}_{10} h_{10}$                                                      |
| Reheating (RH)                                                      | $(\dot{m}_{10} - \dot{m}_{14}) = \dot{m}_{11}$              | $(\dot{m}_{10} h_{10} - \dot{m}_{14} h_{14}) + \dot{Q}_{PTC} = \dot{m}_{11} h_{11}$                        |
| Low-P Turbine (LPT)                                                 | $\dot{m}_{11} = \dot{m}_{12} + \dot{m}_{13}$                | $\dot{m}_{11} h_{11} = \dot{W}_{LPT} + \dot{m}_{12} h_{12} + \dot{m}_{13} h_{13}$                          |
| Condenser 1 (Cond1)                                                 | $\dot{m}_{13} = \dot{m}_1$                                  | $\dot{m}_{13} h_{13} = \dot{m}_1 h_1 + \dot{Q}_{Cond1}$                                                    |
| Dual Evaporator Vapor Compression Refrigeration System (DEVCR)      |                                                             |                                                                                                            |
| Compressor (Comp)                                                   | $\dot{m}_{17} = \dot{m}_{18}$                               | $\dot{m}_{17} h_{17} + \dot{W}_{Comp} = \dot{m}_{18} h_{18}$                                               |
| Condenser 2 (Cond2)                                                 | $\dot{m}_{18} = \dot{m}_{19}$                               | $\dot{m}_{18} h_{18} = \dot{m}_{19} h_9 + \dot{Q}_{Cond2}$                                                 |
| Expansion Valve 1 (ExpV1)                                           | $\dot{m}_{19_{V1}} = \dot{m}_{20}$                          | $\dot{m}_{19_{V1}} h_{19_{V1}} = \dot{m}_{20} h_{20}$                                                      |
| Expansion Valve 2 (ExpV2)                                           | $\dot{m}_{19_{V2}} = \dot{m}_{22}$                          | $\dot{m}_{19_{V2}} h_{19_{V2}} = \dot{m}_{22} h_{22}$                                                      |
| Expansion Valve 3 (ExpV3)                                           | $\dot{m}_{21} = \dot{m}_{43}$                               | $\dot{m}_{21} h_{21} = \dot{m}_{43} h_{43}$                                                                |
| Evaporator 1 (Evap1)                                                | $\dot{m}_{20} = \dot{m}_{21}$                               | $\dot{m}_{20} h_{20} + \dot{Q}_{Evap1} = \dot{m}_{21} h_{21}$                                              |
| Evaporator 2 (Evap2)                                                | $\dot{m}_{22} = \dot{m}_{23}$                               | $\dot{m}_{22} h_{22} + \dot{Q}_{Evap2} = \dot{m}_{23} h_{23}$                                              |
| Mixing Chamber 2 (MC2)                                              | $\dot{m}_{23} + \dot{m}_{43} = \dot{m}_{17}$                | $\dot{m}_{23} h_{23} + \dot{m}_{43} h_{43} = \dot{m}_{17} h_{17}$                                          |
| Direct Contact Membrane Distillation Crystallization System (DCMDC) |                                                             |                                                                                                            |
| Pump 4 (P4)                                                         | $\dot{m}_{24} = \dot{m}_{25}$                               | $\dot{m}_{24} h_{24} + \dot{W}_{P4} = \dot{m}_{25} h_{25}$                                                 |
| Heater (HT)                                                         | $\dot{m}_{25} = \dot{m}_{26}$                               | $\dot{m}_{25} h_{25} + \dot{Q}_{Cond2} = \dot{m}_{26} h_{26}$                                              |
| (PVF) Membrane Module                                               | $\dot{m}_{26} + \dot{m}_{31} = \dot{m}_{27} + \dot{m}_{32}$ | $\dot{m}_{26} h_{26} + \dot{m}_{31} h_{31} = \dot{m}_{27} h_{27} + \dot{m}_{32} h_{32}$                    |
| Cooler (CO)                                                         | $\dot{m}_{27} = \dot{m}_{28}$                               | $\dot{m}_{27} h_{27} = \dot{m}_{28} h_{28} + \dot{Q}_{Evap2_{CO}}$                                         |
| Freshwater Tank (FWT)                                               | $\dot{m}_{28} + \dot{m}_{38} = \dot{m}_{29} + \dot{m}_{39}$ | $\dot{m}_{28} h_{28} + \dot{m}_{38} h_{38} = \dot{m}_{29} h_{29} + \dot{m}_{39} h_{39}$                    |
| Pump 5 (P5)                                                         | $\dot{m}_{29} = \dot{m}_{30}$                               | $\dot{m}_{29} h_{29} + \dot{W}_{P5} = \dot{m}_{30} h_{30}$                                                 |
| Crystallizer (CR)                                                   | $\dot{m}_{32} = \dot{m}_{33} + \dot{m}_{35}$                | $\dot{m}_{32} h_{32} = \dot{m}_{33} h_{33} + \dot{m}_{35} h_{35} + \dot{Q}_{Evap2_{CR}}$                   |
| Hydroponic Solution (HSP)                                           | $\dot{m}_{33} + \dot{m}_{39} = \dot{m}_{34}$                | $\dot{m}_{33} h_{33} + \dot{m}_{39} h_{39} = \dot{m}_{34} h_{34}$                                          |
| Chlor-Alkali System (CAS)                                           |                                                             |                                                                                                            |
| Chlor-Alkali Reactor (CAR)                                          | $\dot{m}_{35} = \dot{m}_{36} + \dot{m}_{40} + \dot{m}_{41}$ | $\dot{m}_{35} h_{35} + \dot{W}_{CAR} = \dot{m}_{36} h_{36} + \dot{m}_{40} h_{40} + \dot{m}_{41} h_{41}$    |
| H <sub>2</sub> Short Storage Tank (HST)                             | $\dot{m}_{40} = \dot{m}_{37} + \dot{m}_{HST,loss}$          | $\dot{m}_{40} h_{40} = \dot{m}_{37} h_{37} + \dot{m}_{HST,loss} h_{HST,loss}$                              |
| Proton Exchange Membrane Fuel Cell (PEMFC)                          |                                                             |                                                                                                            |
| PEMFC                                                               | $\dot{m}_{37} + \dot{m}_{42} = \dot{m}_{38}$                | $\dot{m}_{37} h_{37} + \dot{m}_{42} h_{42} = \dot{m}_{38} h_{38} + \dot{W}_{PEMFC} + \dot{Q}_{loss,PEMFC}$ |

**Table S2.** Balance entropy and exergy balance equations for each system.

| <b>Steam Rankine Cycle (SRC)</b>                                           |                                                                                                                       |                                                                                                                                              |
|----------------------------------------------------------------------------|-----------------------------------------------------------------------------------------------------------------------|----------------------------------------------------------------------------------------------------------------------------------------------|
| <b>Unit Name</b>                                                           | <b>Entropy Balance Equation (EnBE)</b>                                                                                | <b>Exergy Balance Equation (ExBE)</b>                                                                                                        |
| (P1)                                                                       | $\dot{m}_1 s_1 + \dot{S}_{gen,P1} = \dot{m}_2 s_2$                                                                    | $\dot{m}_1 ex_1 + \dot{W}_{P1} = \dot{m}_2 ex_2 + \dot{E}x_{d,P1}$                                                                           |
| (OFWH)                                                                     | $\dot{m}_{12} s_{12} + \dot{m}_2 s_2 + \dot{S}_{gen,OFWH} = \dot{m}_3 s_3$                                            | $\dot{m}_{12} ex_{12} + \dot{m}_2 ex_2 = \dot{m}_3 ex_3 + \dot{E}x_{d,OFWH}$                                                                 |
| (P2)                                                                       | $\dot{m}_3 s_3 + \dot{S}_{gen,P2} = \dot{m}_4 s_4$                                                                    | $\dot{m}_3 ex_3 + \dot{W}_{P2} = \dot{m}_4 ex_4 + \dot{E}x_{d,P2}$                                                                           |
| (CFWH)                                                                     | $\dot{m}_{14} s_{14} + \dot{m}_4 s_4 + \dot{S}_{gen,CFWH} = \dot{m}_6 s_6 + \dot{m}_5 s_5$                            | $\dot{m}_{14} ex_{14} + \dot{m}_4 ex_4 = \dot{m}_6 ex_6 + \dot{m}_5 ex_5 + \dot{E}x_{d,CFWH}$                                                |
| (P3)                                                                       | $\dot{m}_6 s_6 + \dot{S}_{gen,P3} = \dot{m}_7 s_7$                                                                    | $\dot{m}_6 ex_6 + \dot{W}_{P3} = \dot{m}_7 ex_7 + \dot{E}x_{d,P3}$                                                                           |
| (MC1)                                                                      | $\dot{m}_7 s_7 + \dot{m}_5 s_5 + \dot{S}_{gen,MC1} = \dot{m}_8 s_8$                                                   | $\dot{m}_7 ex_7 + \dot{m}_5 ex_5 = \dot{m}_8 ex_8 + \dot{E}x_{d,MC1}$                                                                        |
| (Br)                                                                       | $\dot{m}_8 s_8 + \dot{S}_{gen,Br} + \frac{\dot{Q}_{PTC}}{T_9} = \dot{m}_9 s_9$                                        | $\dot{m}_8 ex_8 + \dot{Q}_{PTC} \left(1 - \frac{T_0}{T_9}\right) = \dot{m}_9 ex_9 + \dot{E}x_{d,Br}$                                         |
| (HPT)                                                                      | $\dot{m}_9 s_9 + \dot{S}_{gen,HPT} = \dot{m}_{10} s_{10}$                                                             | $\dot{m}_9 ex_9 = \dot{W}_{HPT} + \dot{m}_{10} ex_{10} + \dot{E}x_{d,HPT}$                                                                   |
| (RH)                                                                       | $(\dot{m}_{10} s_{10} - \dot{m}_{14} s_{14}) + \dot{S}_{gen,RH} + \frac{\dot{Q}_{PTC}}{T_{11}} = \dot{m}_{11} s_{11}$ | $(\dot{m}_{10} ex_{10} - \dot{m}_{14} ex_{14}) + \dot{Q}_{PTC} \left(1 - \frac{T_0}{T_{11}}\right) = \dot{m}_{11} ex_{11} + \dot{E}x_{d,RH}$ |
| (LPT)                                                                      | $\dot{m}_{11} s_{11} + \dot{S}_{gen,LPT} = \dot{m}_{12} s_{12} + \dot{m}_{13} s_{13}$                                 | $\dot{m}_{11} ex_{11} = \dot{W}_{LPT} + \dot{m}_{12} ex_{12} + \dot{m}_{13} ex_{13} + \dot{E}x_{d,LPT}$                                      |
| (Cond1)                                                                    | $\dot{m}_{13} s_{13} + \dot{S}_{gen,Cond1} = \dot{m}_1 s_1 + \frac{\dot{Q}_{Cond1}}{T_{space}}$                       | $\dot{m}_{13} ex_{13} = \dot{m}_1 ex_1 + \dot{Q}_{Cond1} \left(1 - \frac{T_0}{T_{space}}\right) + \dot{E}x_{d,Cond1}$                        |
| <b>Dual Evaporator Vapor Compression Refrigeration System (DEVCR)</b>      |                                                                                                                       |                                                                                                                                              |
| (Comp)                                                                     | $\dot{m}_{17} s_{17} + \dot{S}_{gen,Comp} = \dot{m}_{18} s_{18}$                                                      | $\dot{m}_{17} ex_{17} + \dot{W}_{Comp} = \dot{m}_{18} ex_{18} + \dot{E}x_{d,Comp}$                                                           |
| (Cond2)                                                                    | $\dot{m}_{18} s_{18} + \dot{S}_{gen,Cond2} = \dot{m}_{19} s_{19} + \frac{\dot{Q}_{Cond2}}{T_{space}}$                 | $\dot{m}_{18} ex_{18} = \dot{m}_{19} ex_9 + \dot{Q}_{Cond2} \left(1 - \frac{T_0}{T_{space}}\right) + \dot{E}x_{d,Cond2}$                     |
| (ExpV1)                                                                    | $\dot{m}_{19V1} s_{19V1} + \dot{S}_{gen,ExpV1} = \dot{m}_{20} s_{20}$                                                 | $\dot{m}_{19V1} ex_{19V1} = \dot{m}_{20} ex_{20} + \dot{E}x_{d,ExpV1}$                                                                       |
| (ExpV2)                                                                    | $\dot{m}_{19V2} s_{19V2} + \dot{S}_{gen,ExpV2} = \dot{m}_{22} s_{22}$                                                 | $\dot{m}_{19V2} ex_{19V2} = \dot{m}_{22} ex_{22} + \dot{E}x_{d,ExpV2}$                                                                       |
| (ExpV3)                                                                    | $\dot{m}_{21} s_{21} + \dot{S}_{gen,ExpV3} = \dot{m}_{43} s_{43}$                                                     | $\dot{m}_{21} ex_{21} = \dot{m}_{43} ex_{43} + \dot{E}x_{d,ExpV3}$                                                                           |
| (Evap1)                                                                    | $\dot{m}_{20} s_{20} + \dot{S}_{gen,Evap1} + \frac{\dot{Q}_{Evap1}}{T_{space}} = \dot{m}_{21} s_{21}$                 | $\dot{m}_{20} ex_{20} + \dot{Q}_{Evap1} \left(1 - \frac{T_0}{T_{space}}\right) = \dot{m}_{21} ex_{21} + \dot{E}x_{d,Evap1}$                  |
| (Evap2)                                                                    | $\dot{m}_{22} s_{22} + \dot{S}_{gen,Evap2} + \frac{\dot{Q}_{Evap2}}{T_{space}} = \dot{m}_{23} s_{23}$                 | $\dot{m}_{22} ex_{22} + \dot{Q}_{Evap2} \left(1 - \frac{T_0}{T_{space}}\right) = \dot{m}_{23} ex_{23} + \dot{E}x_{d,Evap2}$                  |
| (MC2)                                                                      | $\dot{m}_{23} s_{23} + \dot{m}_{43} s_{43} + \dot{S}_{gen,MC2} = \dot{m}_{17} s_{17}$                                 | $\dot{m}_{23} ex_{23} + \dot{m}_{43} ex_{43} = \dot{m}_{17} ex_{17} + \dot{E}x_{d,MC2}$                                                      |
| <b>Direct Contact Membrane Distillation Crystallization System (DCMDC)</b> |                                                                                                                       |                                                                                                                                              |
| (P4)                                                                       | $\dot{m}_{24} s_{24} + \dot{S}_{gen,P4} = \dot{m}_{25} s_{25}$                                                        | $\dot{m}_{24} ex_{24} + \dot{W}_{P4} = \dot{m}_{25} ex_{25} + \dot{E}x_{d,P4}$                                                               |
| (HT)                                                                       | $\dot{m}_{25} s_{25} + \dot{S}_{gen,HT} + \frac{\dot{Q}_{Cond2}}{T_{26}} = \dot{m}_{26} s_{26}$                       | $\dot{m}_{25} ex_{25} + \dot{Q}_{Cond2} \left(1 - \frac{T_0}{T_{space}}\right) = \dot{m}_{26} ex_{26} + \dot{E}x_{d,HT}$                     |
| (PVF)                                                                      | $\dot{m}_{26} s_{26} + \dot{m}_{31} s_{31} + \dot{S}_{gen,PVF} = \dot{m}_{27} s_{27} + \dot{m}_{32} s_{32}$           | $\dot{m}_{26} ex_{26} + \dot{m}_{31} ex_{31} = \dot{m}_{27} ex_{27} + \dot{m}_{32} ex_{32} + \dot{E}x_{d,PVF}$                               |

|                                                   |                                                                                                                                            |                                                                                                                                                                                     |
|---------------------------------------------------|--------------------------------------------------------------------------------------------------------------------------------------------|-------------------------------------------------------------------------------------------------------------------------------------------------------------------------------------|
| (CO)                                              | $\dot{m}_{27}S_{27} + \dot{S}_{gen,CO} = \dot{m}_{28}S_{28} + \frac{\dot{Q}_{Evap2CO}}{T_{Space}}$                                         | $\dot{m}_{27}ex_{27} = \dot{m}_{28}ex_{28} + \dot{Q}_{Evap2CO} \left(1 - \frac{T_0}{T_{space}}\right) + \dot{E}x_{d,CO}$                                                            |
| (FWT)                                             | $\dot{m}_{28}S_{28} + \dot{m}_{38}S_{38} + \dot{S}_{gen,FWT} = \dot{m}_{29}S_{29} + \dot{m}_{39}S_{39}$                                    | $\dot{m}_{28}ex_{28} + \dot{m}_{38}ex_{38} = \dot{m}_{29}ex_{29} + \dot{m}_{39}ex_{39} + \dot{E}x_{d,FWT}$                                                                          |
| (P5)                                              | $\dot{m}_{29}S_{29} + \dot{S}_{gen,P5} = \dot{m}_{30}S_{30}$                                                                               | $\dot{m}_{29}ex_{29} + \dot{W}_{P5} = \dot{m}_{30}ex_{30} + \dot{E}x_{d,P5}$                                                                                                        |
| (CR)                                              | $\dot{m}_{32}S_{32} + \dot{S}_{gen,CR} = \dot{m}_{33}S_{33} + \dot{m}_{35}S_{35} + \frac{\dot{Q}_{Evap2CR}}{T_{Space}}$                    | $\dot{m}_{32}ex_{32} = \dot{m}_{33}ex_{33} + \dot{m}_{35}ex_{35} + \dot{Q}_{Evap2CR} \left(1 - \frac{T_0}{T_{space}}\right) + \dot{E}x_{d,CR}$                                      |
| (HSP)                                             | $\dot{m}_{33}S_{33} + \dot{m}_{39}S_{39} + \dot{S}_{gen,HSP} = \dot{m}_{34}S_{34}$                                                         | $\dot{m}_{33}ex_{33} + \dot{m}_{39}ex_{39} = \dot{m}_{34}ex_{34} + \dot{E}x_{d,HSP}$                                                                                                |
| <b>Chlor-Alkali System (CAS)</b>                  |                                                                                                                                            |                                                                                                                                                                                     |
| (CAR)                                             | $\dot{m}_{35}S_{35} + \dot{S}_{gen,CAR} = \dot{m}_{36}S_{36} + \dot{m}_{40}S_{40} + \dot{m}_{41}S_{41}$                                    | $\dot{m}_{35}ex_{35} + \dot{W}_{CAR} = \dot{m}_{36}ex_{36} + \dot{m}_{40}ex_{40} + \dot{m}_{41}ex_{41} + \dot{E}x_{d,CAR}$                                                          |
| (HST)                                             | $\dot{m}_{40}S_{40} + \dot{S}_{gen,HST} = \dot{m}_{37}S_{37} + \dot{m}_{HST,loss}S_{HST,loss}$                                             | $\dot{m}_{40}ex_{40} = \dot{m}_{37}ex_{37} + \dot{m}_{HST,loss}ex_{HST,loss} + \dot{E}x_{d,HST}$                                                                                    |
| <b>Proton Exchange Membrane Fuel Cell (PEMFC)</b> |                                                                                                                                            |                                                                                                                                                                                     |
| PEMFC                                             | $\dot{m}_{37}S_{37} + \dot{m}_{42}S_{42} + \dot{S}_{gen,PEMFC} = \dot{m}_{38}S_{38} + \frac{\dot{Q}_{loss,PEMFC}}{\frac{T_{37} + T_0}{2}}$ | $\dot{m}_{37}ex_{37} + \dot{m}_{42}ex_{42} = \dot{m}_{38}ex_{38} + \dot{W}_{PEMFC} + \dot{Q}_{loss,PEMFC} \left(1 - \frac{T_0}{\frac{T_{37} + T_0}{2}}\right) + \dot{E}x_{d,PEMFC}$ |

**Table S3.** Energy and exergy efficiencies equations for each system.

| System   | Energy Efficiency                                                                                                                                                                                                          | Exergy Efficiency                                                                                                                                                                                                                                                              |
|----------|----------------------------------------------------------------------------------------------------------------------------------------------------------------------------------------------------------------------------|--------------------------------------------------------------------------------------------------------------------------------------------------------------------------------------------------------------------------------------------------------------------------------|
| SRC      | $\eta_{en_{SRC}} = 1 - \frac{\dot{Q}_{out_{SRC}}}{\dot{Q}_{in_{SRC}}}$                                                                                                                                                     | $\eta_{ex_{SRC}} = 1 - \frac{\dot{W}_{net_{SRC}}}{\dot{Q}_{in_{SRC}} \cdot \left(1 - \frac{T_0}{T_9}\right)}$                                                                                                                                                                  |
| DEVCR    | $COP_{en_{DEVCR}} = \frac{\dot{Q}_{Evap1} + \dot{Q}_{Evap2}}{\dot{W}_{Comp}}$                                                                                                                                              | $COP_{ex_{DEVCR}} = \frac{\dot{Q}_{Evap1} \cdot \left(1 - \frac{T_0}{T_{out}}\right) + \dot{Q}_{Evap2} \cdot \left(1 - \frac{T_0}{T_{23}}\right)}{\dot{W}_{Comp}}$                                                                                                             |
| DCMDC-CR | $\eta_{en_{DCMDC-CR}} = \frac{\dot{m}_{28} \cdot h_{28} + \dot{m}_{33} \cdot h_{33} + (\dot{m}_{26} \cdot h_{26} - \dot{m}_{32} \cdot h_{32})}{\dot{m}_{24} \cdot h_{24} + \dot{Q}_{in,DCMDC-CR} + \dot{W}_{in,DCMDC-CR}}$ | $\eta_{ex_{DCMDC-CR}} = \frac{\dot{m}_{28} \cdot ex_{28} + \dot{m}_{33} \cdot ex_{33} + (\dot{m}_{26} \cdot ex_{26} - \dot{m}_{32} \cdot ex_{32})}{\dot{m}_{24} \cdot ex_{24} + \dot{Q}_{in,DCMDC-CR} \cdot \left(1 - \frac{T_0}{T_{space}}\right) + \dot{W}_{in_{DCMDC-CR}}}$ |
| CAS      | $\eta_{en_{CAS}} = \frac{\dot{m}_{40} \cdot h_{40} + \dot{m}_{41} \cdot h_{41} + \dot{m}_{36} \cdot h_{36}}{\dot{m}_{35} \cdot h_{35} + \dot{W}_{in_{CAS}}}$                                                               | $\eta_{ex_{CAS}} = \frac{\dot{m}_{40} \cdot ex_{40} + \dot{m}_{41} \cdot ex_{41} + \dot{m}_{36} \cdot ex_{36}}{\dot{m}_{35} \cdot ex_{35} + \dot{W}_{in_{CAS}}}$                                                                                                               |
| PEMFC    | $\eta_{en_{PEM}} = \frac{\dot{W}_{PEM}}{\dot{m}_{37} \cdot h_{37} + \dot{m}_{42} \cdot h_{42}}$                                                                                                                            | $\eta_{ex_{PEM}} = \frac{\dot{W}_{PEM}}{\dot{m}_{37} \cdot ex_{37} + \dot{m}_{42} \cdot ex_{42}}$                                                                                                                                                                              |
| PTC      | $\eta_{en_{PTC}} = \frac{\dot{m}_{15} \cdot h_{15} - \dot{m}_{16} \cdot h_{16}}{\dot{Q}_{PTC}}$                                                                                                                            | $\eta_{ex_{PTC}} = \frac{\dot{m}_{15} \cdot ex_{15} - \dot{m}_{16} \cdot ex_{16}}{\dot{Q}_{PTC} \cdot \left(1 - \frac{T_0}{T_{sun}}\right)}$                                                                                                                                   |

**Table S4.** Input parameters for the whole system.

| Parameter                                       | Value                           |
|-------------------------------------------------|---------------------------------|
| Ambient temperature, $T_0$                      | 298.15 K                        |
| Ambient pressure, $P_0$                         | 101.325 kPa                     |
| SRC Lower pressure, $P_1$                       | 10 kPa [45]                     |
| High-pressure turbine inlet pressure, $P_9$     | 15000 kPa [45]                  |
| High-pressure turbine inlet temperature, $T_9$  | 673.15 K [45]                   |
| High-pressure turbine outlet pressure, $P_{10}$ | 4000 kPa [45]                   |
| Turbines isentropic efficiency, $\eta_{is,T}$   | 80 % [45]                       |
| Pumps isentropic efficiency, $\eta_{is,Pu}$     | 80 % [45]                       |
| Sun temperature, $T_{sun}$                      | 5700 K [51]                     |
| Solar irradiation, $I_{sun}$                    | 0.5 kW/m <sup>2</sup> (assumed) |
| Energy efficiency, $\eta_{en,PTC}$              | 90 % [52]                       |
| DCMDC Feed salinity                             | 35 g/kg (assumed)               |
| DCMDC Output salinity                           | 0.5 g/kg (assumed)              |
| DCMDC feed temperature, $T_{26}$                | 313.15 K (assumed)              |
| DCMDC Recovery ratio                            | 70 % [48]                       |
| Seawater feed mass flow rate                    | 5 kg/s (assumed)                |
| CR Recovery ratio                               | 60 % [48]                       |
| Cl <sub>2</sub> Chemical exergy                 | 123600 kJ/kmol [38]             |
| NaCl Chemical exergy                            | 14300 kJ/kmol [38]              |
| NaOH Chemical exergy                            | 74900 kJ/kmol [38]              |
| H <sub>2</sub> Chemical exergy                  | 236090 kJ/kmol [38]             |
| H <sub>2</sub> Chemical exergy                  | 117108 kJ/kg [53]               |
| H <sub>2</sub> Lower heating value              | 120000 kJ/kg [50]               |
| O <sub>2</sub> Chemical exergy                  | 124.1 kJ/kg [50]                |
| DEVCR High-pressure, $P_{18}$                   | 1200 kPa [46]                   |
| DEVCR ExpV2 pressure, $P_{17}$                  | 250 kPa [46]                    |
| DEVCR ExpV1 pressure, $P_{22}$                  | 100 kPa [46]                    |
| Compressor isentropic efficiency                | 80 % [46]                       |
| Greenhouse dimensions                           | 10 m x 20 m x 3 m<br>(assumed)  |
| Number of greenhouses                           | 25 greenhouses (assumed)        |
| Greenhouse space temperature                    | 293.15 K [54]                   |

**Table S5.** Thermodynamics data for the state points.

| State # | T(K)  | P(kPa) | h(kJ/kg) | s(kJ/kg-K) | ex(kJ/kg) | ṁ(kg/s)  | Material            |
|---------|-------|--------|----------|------------|-----------|-----------|---------------------|
| 0       | 298.2 | 101.3  | 104.8    | 0.3669     | 0         | -         | Water               |
| 1       | 319   | 10     | 191.8    | 0.6493     | 2.814     | 0.8782    | Water               |
| 2       | 319   | 500    | 192.5    | 0.6496     | 3.317     | 0.8782    | Water               |
| 3       | 425   | 500    | 640.4    | 1.861      | 90.07     | 1.058     | Water               |
| 4       | 427.5 | 15000  | 660.1    | 1.87       | 107       | 1.058     | Water               |
| 5       | 523.5 | 15000  | 1088     | 2.771      | 266       | 1.058     | Water               |
| 6       | 523.5 | 4000   | 1087     | 2.796      | 258.1     | 0.271     | Water               |
| 7       | 527.1 | 15000  | 1104     | 2.803      | 273.3     | 0.271     | Water               |
| 8       | 524.3 | 15000  | 1091     | 2.777      | 267.5     | 1.329     | Water               |
| 9       | 673.2 | 15000  | 2975     | 5.88       | 1226      | 1.329     | Water               |
| 10      | 523.5 | 4000   | 2756     | 5.984      | 976.6     | 1.329     | Water               |
| 11      | 673.2 | 4000   | 3213     | 6.769      | 1200      | 1.058     | Water               |
| 12      | 458.6 | 500    | 2824     | 6.991      | 743.7     | 0.1802    | Water               |
| 13      | 319   | 10     | 2358     | 7.439      | 144.2     | 0.8782    | Water               |
| 14      | 523.5 | 4000   | 2756     | 5.984      | 976.6     | 0.271     | Water               |
| 15      | 673.2 | 15000  | 2975     | 5.88       | 1226      | 1.277     | Water               |
| 16      | 475.4 | 15000  | 867.9    | 2.331      | 177.5     | 1.277     | Water               |
| 17      | 356.7 | 100    | 328.9    | 1.267      | 4.33      | 7.4       | R134a               |
| 18      | 374.8 | 1200   | 426.8    | 1.31       | 89.23     | 7.4       | R134a               |
| 19      | 319.4 | 1200   | 117.8    | 0.4244     | 44.31     | 7.4       | R134a               |
| 20      | 268.8 | 250    | 117.8    | 0.4498     | 36.72     | 2.22      | R134a               |
| 21      | 288.9 | 250    | 265.4    | 0.9966     | 21.33     | 2.22      | R134a               |
| 22      | 246.8 | 100    | 117.8    | 0.4791     | 28.01     | 5.18      | R134a               |
| 23      | 385   | 100    | 356.1    | 1.34       | 9.662     | 5.18      | R134a               |
| 24      | 298.2 | 100    | 99.76    | 0.3498     | -0.001293 | 5         | Seawater            |
| 25      | 298.8 | 100    | 102.2    | 0.3579     | -0.002195 | 5         | Seawater            |
| 26      | 353.2 | 100    | 320.5    | 1.029      | 18.14     | 5         | Seawater            |
| 27      | 348.2 | 100    | 313.8    | 1.015      | 18.14     | 3.684     | Freshwater          |
| 28      | 288.2 | 100    | 63.02    | 0.2245     | 3.118     | 3.684     | Freshwater          |
| 29      | 288.2 | 100    | 63.02    | 0.2245     | 3.118     | 0.1842    | Freshwater          |
| 30      | 288.8 | 100    | 65.53    | 0.2332     | 3.034     | 0.1842    | Freshwater          |
| 31      | 288.8 | 100    | 65.53    | 0.2332     | 3.034     | 0.1842    | Freshwater          |
| 32      | 339.2 | 100    | 246.8    | 0.7883     | 16.25     | 1.5       | Brine               |
| 33      | 283.2 | 100    | 42.09    | 0.1512     | 4.037     | 0.9       | Irrigation-water    |
| 34      | 285.7 | 100    | 52.56    | 0.188      | 3.53      | 4.394     | Hydroponic solution |
| 35      | 283.2 | 100    | 35.51    | 0.1068     | 8.201     | 0.6       | Brine NaCl+H2O      |
| 36      | 285.2 | 100    | -6.203   | 3.125      | 1743      | 0.03254   | Cl <sub>2</sub>     |
| 37      | 285.2 | 100    | 123746   | 52.79      | 117096    | 0.0008326 | H <sub>2</sub>      |
| 38      | 294.2 | 100    | 88.11    | 0.3104     | 527.4     | 0.007494  | H <sub>2</sub> O    |
| 39      | 288.2 | 100    | 63.02    | 0.2245     | 3.118     | 3.494     | Freshwater          |
| 40      | 285.2 | 100    | 123746   | 52.79      | 117096    | 0.0009252 | H <sub>2</sub>      |
| 41      | 285.2 | 100    | -12296   | 2.213      | 1456      | 0.01835   | NaOH                |
| 42      | 303.2 | 101.3  | 4.3      | 0.01446    | 124.1     | 0.006661  | O <sub>2</sub>      |
| 43      | 285.1 | 100    | 265.4    | 1.068      | -0.06586  | 2.22      | R134a               |
| 44      | 285.2 | 100    | -15688   | 3.63       | 521.1     | 0.5621    | Depleted NaCl       |

**Table S6.** Inputs and outputs of each and overall system.

|                       |                              |         |                              |                                |         |
|-----------------------|------------------------------|---------|------------------------------|--------------------------------|---------|
| <b>SRC</b>            | $\dot{W}_{P1}$ (kW)          | 0.54    | <b>DEVCR</b>                 | $\dot{W}_{Comp}$ (kW)          | 724.20  |
|                       | $\dot{W}_{P2}$ (kW)          | 20.88   |                              | $\dot{Q}_{Cond2}$ (kW)         | 2287.00 |
|                       | $\dot{W}_{P3}$ (kW)          | 4.64    |                              | $\dot{Q}_{Evap1}$ (kW)         | 327.80  |
|                       | $\dot{Q}_{BR}$ (kW)          | 2504    |                              | $\dot{Q}_{Evap2}$ (kW)         | 1235.00 |
|                       | $\dot{Q}_{RH}$ (kW)          | 483.8   |                              | $COP_{en,DEVCR}$               | 2.16    |
|                       | $\dot{Q}_{Cond1}$ (kW)       | 1902    |                              | $COP_{ex,DEVCR}$               | 0.37    |
|                       | $\dot{Q}_{in,SRC}$ (kW)      | 2988    |                              | $\dot{Q}_{PTC}$ (kW)           | 2988    |
|                       | $\dot{W}_{HPT}$ (kW)         | 290.4   | <b>PTC</b>                   | $\dot{Q}_{loss,PTC}$ (kW)      | 298.80  |
|                       | $\dot{W}_{LPT}$ (kW)         | 821.7   |                              | $A_{PTC}$ (m <sup>2</sup> )    | 5976    |
|                       | $\dot{W}_{net,SRC}$ (kW)     | 1086    |                              | $I_{sun}$ (kW/m <sup>2</sup> ) | 0.5     |
|                       | $\eta_{en,SRC}$ (%)          | 36.34   |                              | $\eta_{en,PTC}$ (%)            | 90.00   |
|                       | $\eta_{ex,SRC}$ (%)          | 34.76   |                              | $\eta_{ex,PTC}$ (%)            | 47.30   |
| <b>DCMDC-CR</b>       | $\dot{m}_{SW}$ (kg/s)        | 5.00    | <b>CAS</b>                   | $\dot{W}_{CAS}$ (kW)           | 420.00  |
|                       | $\dot{m}_{FW}$ (kg/s)        | 3.5     |                              | $\dot{m}_{NaCl}$ (kg/s)        | 0.60    |
|                       | $\dot{m}_{Brine}$ (kg/s)     | 1.50    |                              | $\dot{m}_{H2}$ (g/s)           | 0.93    |
|                       | $\dot{W}_{P4}$ (kW)          | 11.97   |                              | $\dot{m}_{Cl2}$ (g/s)          | 32.54   |
|                       | $\dot{W}_{P5}$ (kW)          | 0.46    |                              | $\dot{m}_{NaOH}$ (g/s)         | 18.35   |
|                       | $\dot{Q}_{CL}$ (kW)          | 923.80  |                              | $\eta_{en,CAS}$ (%)            | 27.25   |
|                       | $\dot{Q}_{HT}$ (kW)          | 1092.00 |                              | $\eta_{ex,CAS}$ (%)            | 25.79   |
|                       | $\dot{Q}_{CR}$ (kW)          | 311.00  | <b>PEMFC</b>                 | $\dot{W}_{PEM}$ (kW)           | 70.62   |
|                       | $\eta_{en,DCMDC}$ (%)        | 52.95   |                              | $\dot{Q}_{loss,PEM}$ (kW)      | 31.78   |
|                       | $\eta_{ex,DCMDC}$ (%)        | 60.81   |                              | $\eta_{en,PEM}$ (%)            | 68.52   |
|                       |                              |         |                              | $\eta_{ex,PEM}$ (%)            | 71.83   |
| <b>Overall system</b> | $\dot{W}_{in,overall}$ (kW)  | 1182.69 | $\dot{Q}_{in,overall}$ (kW)  | 5314.60                        |         |
|                       | $\dot{W}_{out,overall}$ (kW) | 1182.69 | $\dot{Q}_{out,overall}$ (kW) | 8739.80                        |         |
|                       | $\eta_{en,overall}$ (%)      | 39.80   | $\eta_{ex,overall}$ (%)      | 41.39                          |         |



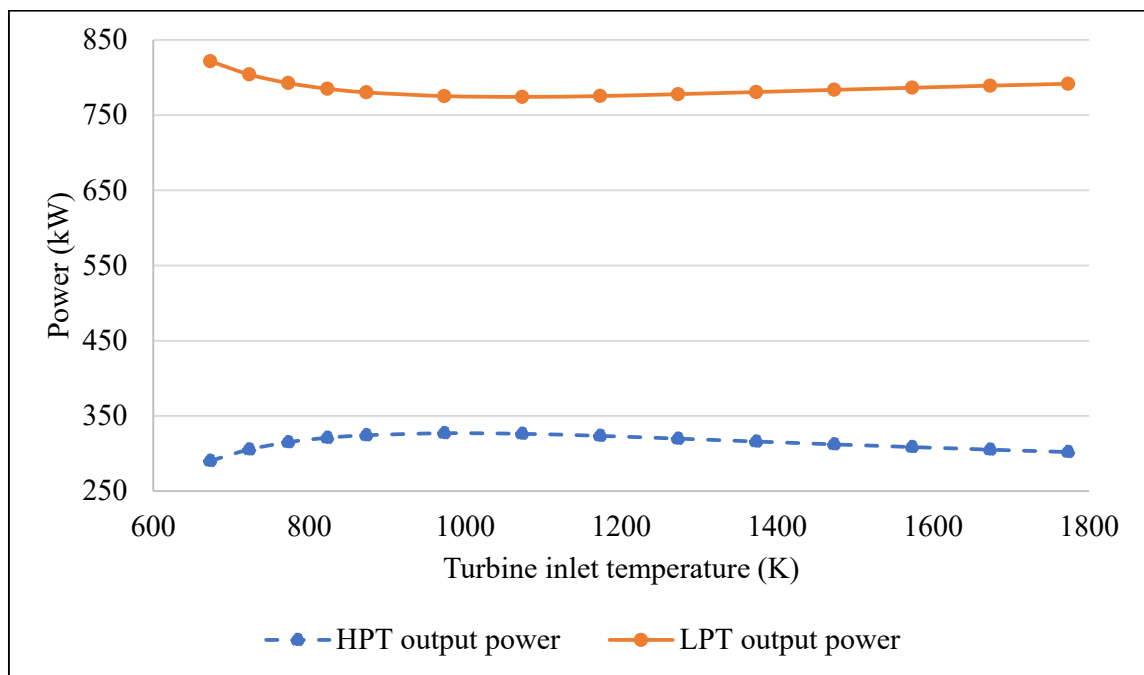

**Figure S1.** Turbine inlet temperature vs. HPT and LPT output power.

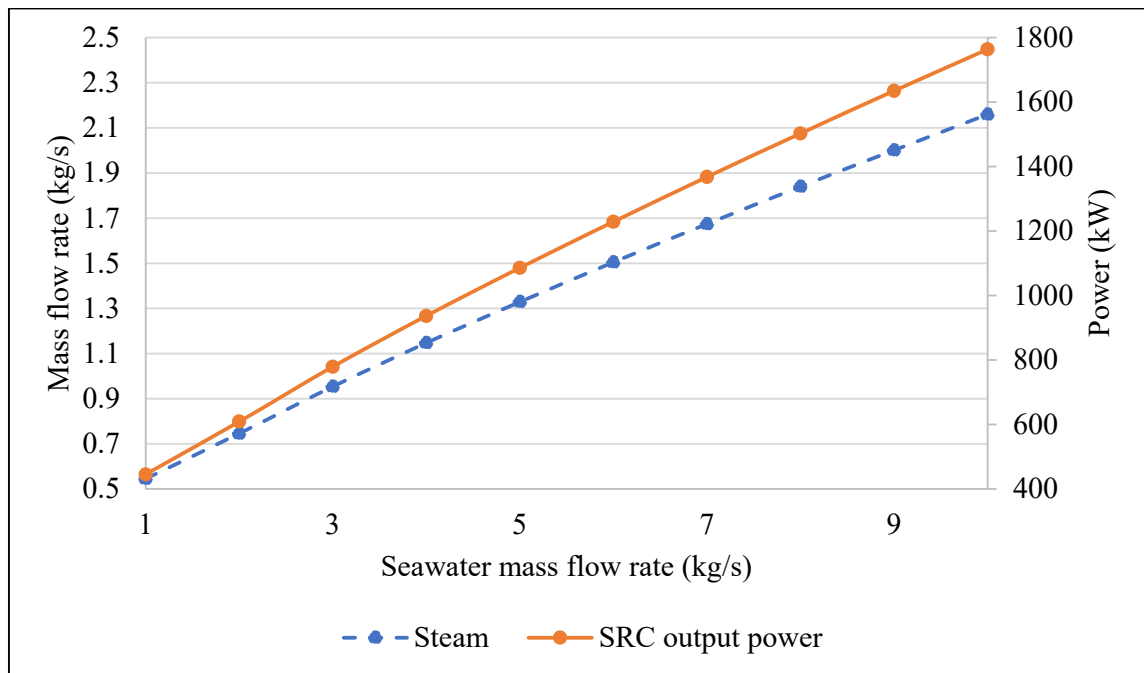

**Figure S2.** Seawater mass flow rate vs. steam mass flow rate and SRC output power.

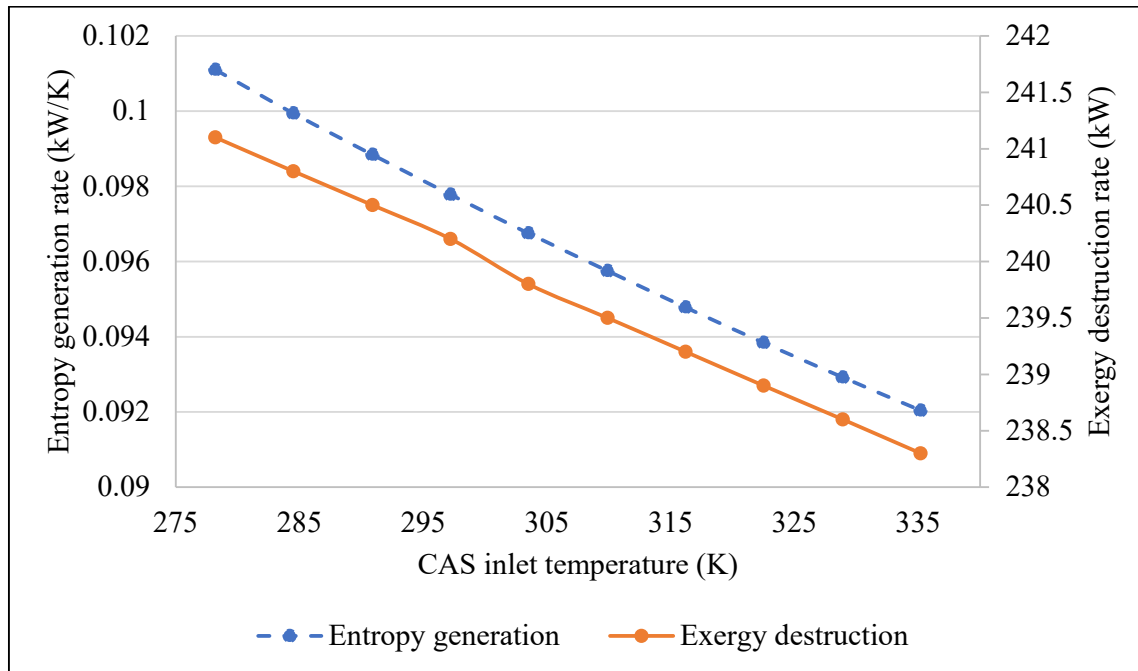

**Figure S3.** CAS inlet temperature vs. CAS entropy generation and CAS exergy destruction rates.

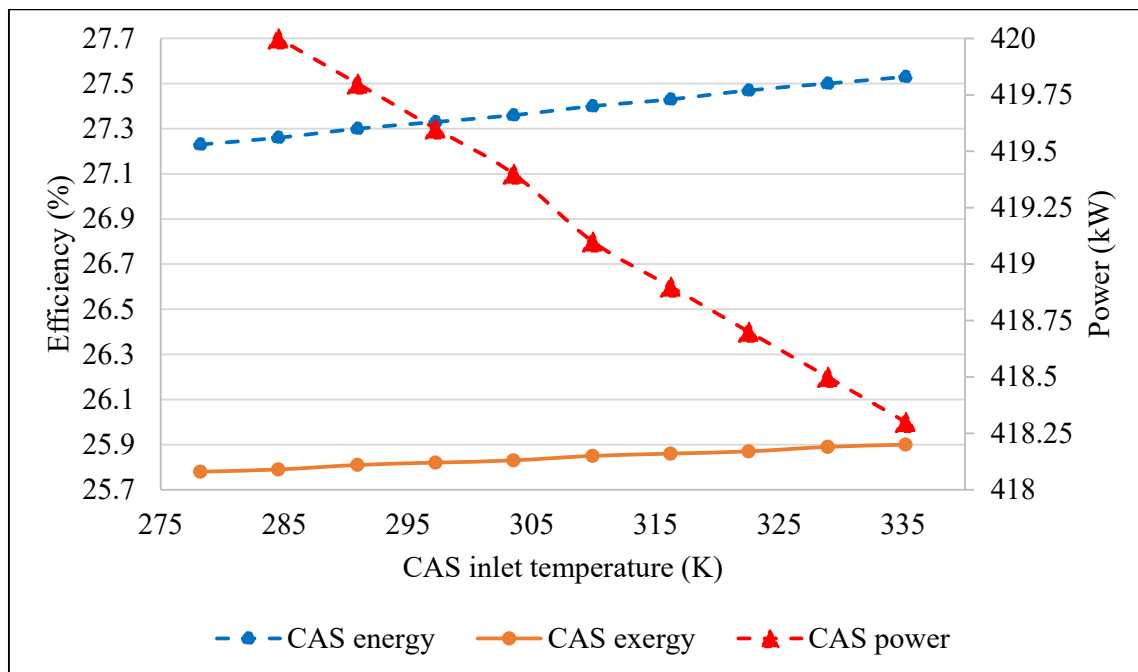

**Figure S4.** CAS inlet temperature vs. CAS power and efficiency.

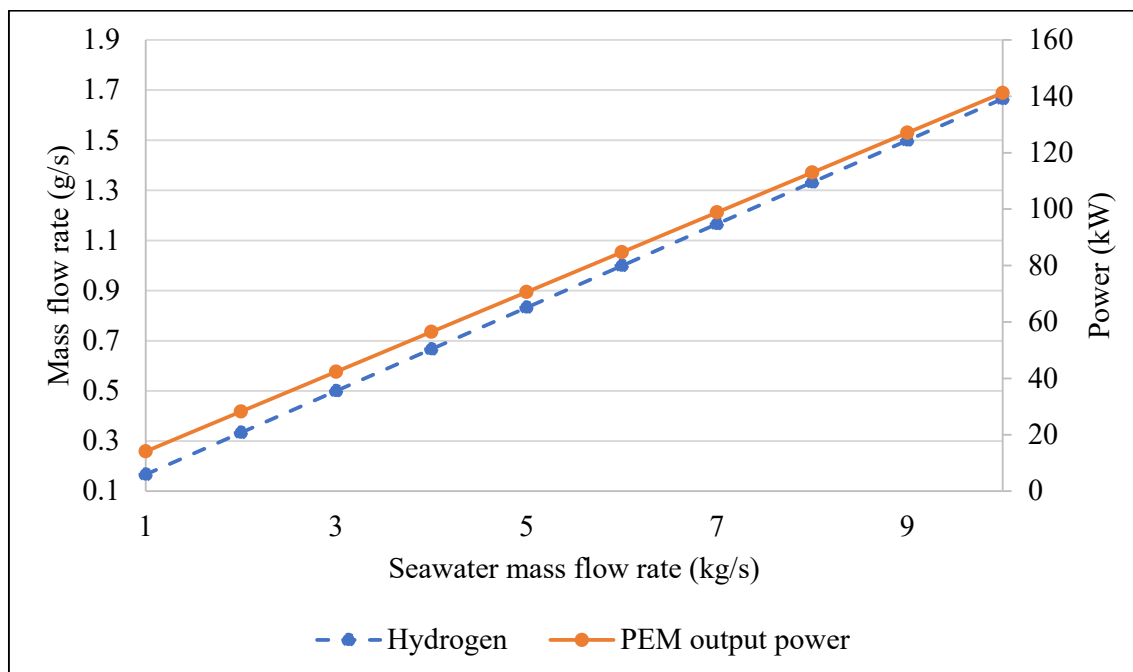

**Figure S5.** Seawater mass flow rate vs. Hydrogen mass flow rate and PEMFC output power.

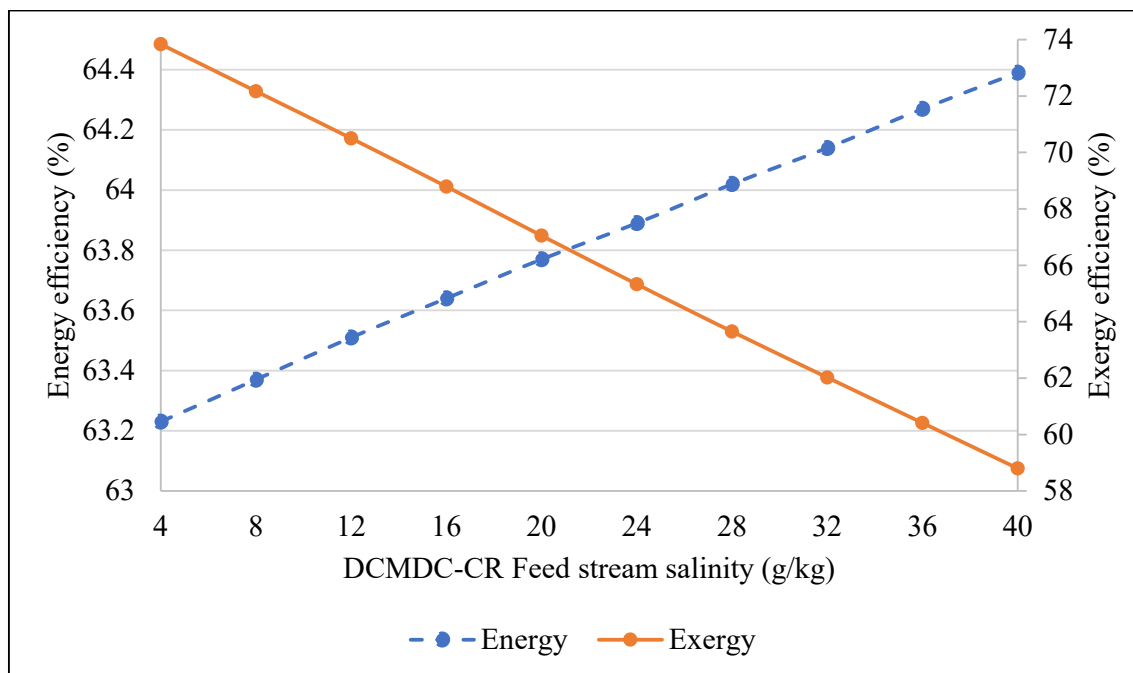

**Figure S6.** DCMDC-CR Feed stream salinity vs. DCMDC-CR energy and exergy efficiencies.

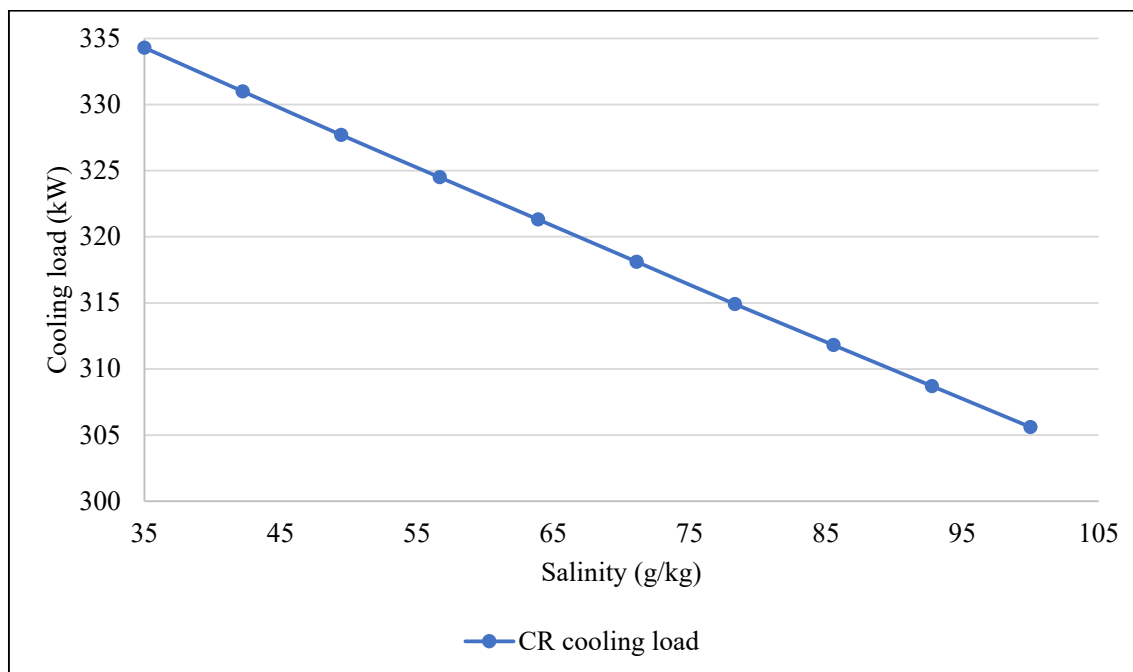

**Figure S7.** CR inlet salinity vs. CR cooling load.

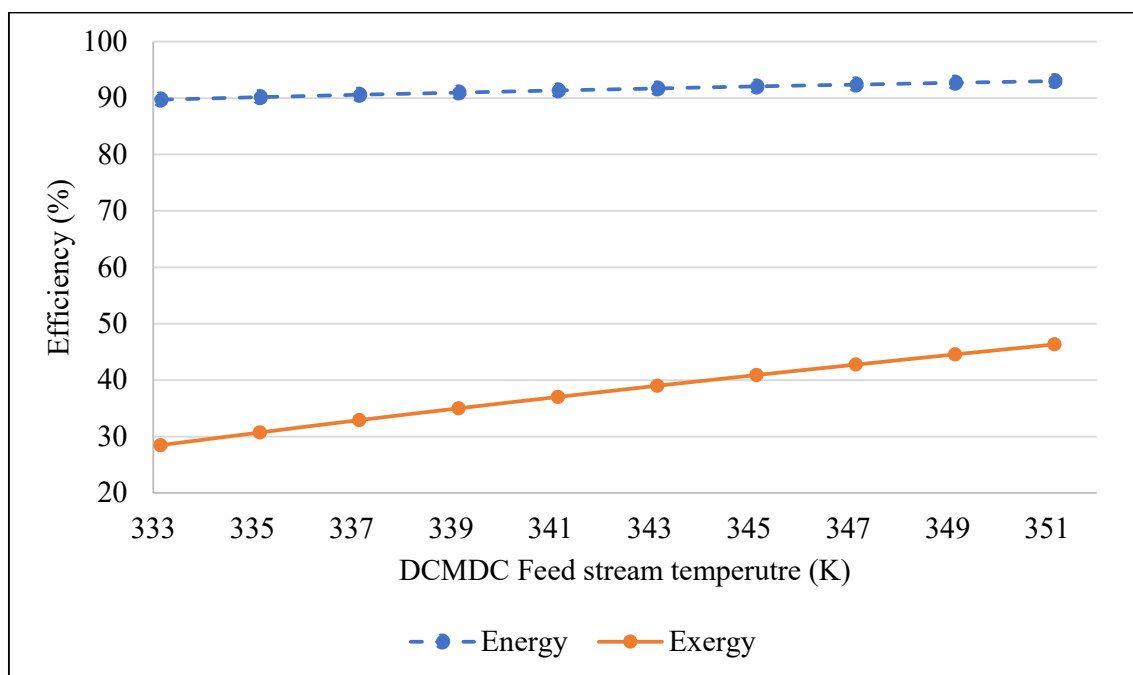

**Figure S8.** DCMDC Feed stream temperature vs. DCMDC energy and exergy efficiencies.
